# Supplementary material for: Risks of psychosis in methamphetamine users: cross-sectional study in Thailand
Source: PubMed Central journal article supplement — BMJ Open. 2019 Oct 14;9(10):e032711. doi: 10.1136/bmjopen-2019-032711 (PMC6797321; doi:10.1136/bmjopen-2019-032711), 2019-10-14
Supplement: bmjopen-2019-032711.draft_revisions.pdf [file bmjopen-2019-032711.draft_revisions.pdf]

# BMJ Open

BMJ Open is committed to open peer review. As part of this commitment we make the peer review history of every article we publish publicly available.

When an article is published we post the peer reviewers' comments and the authors' responses online. We also post the versions of the paper that were used during peer review. These are the versions that the peer review comments apply to.

The versions of the paper that follow are the versions that were submitted during the peer review process. They are not the versions of record or the final published versions. They should not be cited or distributed as the published version of this manuscript.

BMJ Open is an open access journal and the full, final, typeset and author-corrected version of record of the manuscript is available on our site with no access controls, subscription charges or pay-per-view fees (<http://bmjopen.bmj.com>).

If you have any questions on BMJ Open's open peer review process please email [info.bmjopen@bmj.com](mailto:info.bmjopen@bmj.com)

# BMJ Open

## Risks of psychosis in methamphetamine users: a cross-sectional study in Thailand

|                               |                                                                                                                                                                                                                                                                    |
|-------------------------------|--------------------------------------------------------------------------------------------------------------------------------------------------------------------------------------------------------------------------------------------------------------------|
| Journal:                      | <i>BMJ Open</i>                                                                                                                                                                                                                                                    |
| Manuscript ID                 | bmjopen-2019-032711                                                                                                                                                                                                                                                |
| Article Type:                 | Research                                                                                                                                                                                                                                                           |
| Date Submitted by the Author: | 02-Jul-2019                                                                                                                                                                                                                                                        |
| Complete List of Authors:     | Lamyai, Warot<br>Pono, Kitkawe<br>Indrakamhaeng, Danai<br>Saengsin, Apichat<br>Songhong, Nartya<br>Khuwuthyakorn, Panu<br>Sribanditmongkol, Pongruk<br>Junkuy, Anongphan<br>Srisurapanont, M ; Chiang Mai University Faculty of Medicine, Department of Psychiatry |
| Keywords:                     | Schizophrenia & psychotic disorders < PSYCHIATRY, Substance misuse < PSYCHIATRY, Adult psychiatry < PSYCHIATRY                                                                                                                                                     |
|                               |                                                                                                                                                                                                                                                                    |

SCHOLARONE™  
Manuscripts

# Risks of psychosis in methamphetamine users: a cross-sectional study in Thailand

**Authors:** Warot Lamyai,<sup>1</sup> Kitkawe Pono,<sup>1</sup> Danai Indrakamhaeng,<sup>2</sup> Apichat Saengsin,<sup>3</sup> Nartya Songhong,<sup>4</sup> Panu Khuwuthyakorn,<sup>5</sup> Pongruk Sribanditmongkol,<sup>6</sup> Anongphan Junkuy,<sup>6</sup> Manit Srisurapanont,<sup>7\*</sup>

## Affiliations:

<sup>1</sup> Nakhon Phanom Rajanagarindra Psychiatric Hospital, Department of Mental Health, Ministry of Public Health, Thailand

<sup>2</sup> Thanyarak Chiang Mai Hospital, Department of Medical Services, Ministry of Public Health, Thailand

<sup>3</sup> Galyarajanagarindra Institute, Department of Mental Health, Ministry of Public Health, Thailand

<sup>4</sup> Songkhla Rajanagarindra Psychiatric Hospital, Department of Mental Health, Ministry of Public Health, Thailand

<sup>5</sup> Suanprung Psychiatric Hospital, Department of Mental Health, Ministry of Public Health, Thailand

<sup>6</sup> Department of Forensic Medicine, Faculty of Medicine, Chiang Mai University, Chiang Mai, Thailand

<sup>7</sup> Department of Psychiatry, Faculty of Medicine, Chiang Mai University, Chiang Mai, Thailand

\*Correspondence to:

Dr. Mani Srisurapanont; [manit.s@cmu.ac.th](mailto:manit.s@cmu.ac.th) (ORCID ID: 0000-0001-6203-1206)

**Word count:** 2,632 words of text (not including 287 words of abstract, 33 references, and 2 tables).

## ABSTRACT

**Objective:** To determine factors related to recent MAP among individuals recently using MA.

**Design:** Cross-sectional study carried out between July 2015 and June 2017.

**Setting:** Four mental health hospitals and one substance abuse treatment center in Thailand.

**Participants:** Individuals recruited onto the study included those aged 18 years or more, of both sexes, who reported MA use in the month prior to admission.

**Measures:** Any recent psychosis was confirmed using the Mini International Neuropsychiatric Interview – Plus, Psychotic Module. The Timeline Follow Back was used to determine days of MA use. The severity of MA dependence was assessed using the Severity of Dependence Scale (SDS). Quantitative hair analysis was carried out to confirm recent use of MA and measure the amount of MA use. We compared several characteristics between those who had recently experienced psychosis and those who had not.

**Results:** This study included 120 participants who had not experienced psychosis and 113 participants who had. The mean age was 28 years and mean abstinence was 17 days. The levels of MA concentration in hair were not significantly different between groups ( $p=0.115$ ). Based on the final logistic regression model, the independent factors associated with MAP (odds ratio, 95% confidence interval) included being male (OR 4.02, 95% CI 1.67-10.90),  $\geq 16$  days of MA use in the past month (OR 2.33, 95% CI 21.23-4.52), MA dependence (OR 9.34, 95% CI 2.44-61.84), hospitalization history related to substance abuse (OR 3.68, 95% CI 2.00-7.00).

**Conclusions:** Health professionals should closely monitor the development of MAP in MA-dependent men who frequently use MA and have a history of hospitalization for substance abuse. The measure of MA concentration levels in the hair may add no benefit for the prediction of the development of MAP.

**Key words:** amphetamine, stimulant, psychotic disorder, predictor, factor

## ARTICLE SUMMARY

### Strengths and limitations of this study

- To minimize the problems of inaccurate recalls on MA use and MAP experience, this study examined risks of recent MAP in a clinical sample in which there was recent use of MA.
- This is the first study using MA concentration levels in the hair to confirm recent MA use and determine the amount of MA use.
- Only few females, intravenous users, and those with a history of hospitalization for mental illnesses participated in this study.
- Some risks of MAP were not included in the study.
- This sample appeared to have mild cognitive impairment, which might affect the accuracy of reported data.

## INTRODUCTION

Methamphetamine-associated psychosis (MAP) is an increasing health problem.

Amphetamines are one of the most common drug use in East and Southeast Asia. In 2016, an estimated 34.2 million people worldwide used amphetamines in the past year <sup>1</sup>. In its class, methamphetamine (MA), a very potent amphetamine derivative, is the most frequently used substance <sup>2</sup>. Between 21 and 46% of MA users are likely to develop psychosis at least once in a lifetime <sup>3</sup>. Based on these estimations, MAP may currently affect millions of people around the world.

The symptoms of MAP are similar to those of schizophrenia and are associated with serious negative consequences. Its common symptoms include auditory hallucinations, visual hallucinations, strange or unusual beliefs, persecutory delusion, and negative psychotic symptoms, which cannot be distinguished from schizophrenic psychotic symptoms <sup>4,5</sup>. These psychotic symptoms usually cause anxiety, fear, terror, and decreased behavioral control. Case of severe psychosis can lead to unpredictable episodes of aggression and violence. Previous studies found that MA users with psychotic symptoms had a higher risk of violent behavior than MA users who had no psychotic symptoms <sup>6</sup>. Other than the more frequent utilization of health services and attempted suicide, MA users with MAP are more likely to have medical, employment, and legal problems than those without MAP <sup>7</sup>. The findings from long-term studies also suggested that 25-38% of individuals with MAP may develop primary or persistent psychosis some time in later life <sup>8,9</sup>.

Because a subset of MA users may develop psychotic symptoms, important questions are raised about MA users who may have an increased risk of MAP. Previous studies suggest that MAP is associated with a number of MA use patterns and psychiatric comorbidities. In early Japanese studies, in which most users exclusively used MA (1955-1992), the investigators found an association between frequent and long-term use of MA and MAP <sup>10</sup>. Based on a recent review, replicated risks factors included early age MA use, frequent and long-term use of MA, MA dependence, alcohol and other drug use, major depressive disorders, and antisocial personality disorders <sup>11</sup>.

Despite the increasing evidence around risk factors of MAP, there are some limitations in previous studies. Firstly, many studies were carried out using patients with a life-time history of MA use and/or MAP. The results of these studies may be less reliable because the

1  
2  
3 participants may not have been able to recall those experiences accurately. Secondly, some of  
4 them did not exclude individuals with primary psychotic disorders prior to MA use. Lastly,  
5 most studies did not use a valid method to confirm or measure the amount of MA use. For  
6 these reasons, we proposed to carry out a cross-sectional study to determine the risks of  
7 psychosis in Thai people who recently used MA and had recently experienced MAP. This  
8 studied population was chosen to minimize the problems of inaccurate recalls on MA use and  
9 MAP experience. We hypothesized that a number of patients' characteristics, including the  
10 amount of MA in hair of the users, should be used as predictors of MAP. This  
11  
12  
13  
14  
15  
16  
17

## 18 **METHODS**

19  
20 This cross-sectional study was carried out in MA users admitted to four mental health  
21 hospitals and one substance abuse treatment center in Thailand. Suanprung Psychiatric  
22 Hospital and Thanyarak Chiang Mai Hospital are located in Northern Thailand. Nakhon  
23 Phanom Rajanagarindra Psychiatric Hospital is located in Northeastern Thailand. The  
24 Galyarajanagarindra Institute is located in Central Thailand. Songkhla Rajanagarindra  
25 Psychiatric Hospital is located in Southern Thailand. The Ethics Committee (EC) for Human  
26 Research of the Ministry of Public Health approved the study protocol for Thanyarak Chiang  
27 Mai Hospital, Nakhon Phanom Rajanagarindra Psychiatric Hospital, and Songkhla  
28 Rajanagarindra Psychiatric Hospital. Each EC for Human Research of Suanprung Psychiatric  
29 Hospital and Galyarajanagarindra Institute approved the study protocol at its site. All the  
30 participants provided written informed consent prior to participation in the studies. All  
31 methods used in the study were performed in accordance with the guidelines given and the  
32 regulation agreed with the ECs. This study carried out between July 2015 and June 2017  
33  
34  
35  
36  
37  
38  
39  
40  
41  
42  
43  
44

### 45 *Participants*

46 We assessed 120 MA users with MAP and 120 MA user without MAP. Participants included  
47 those aged 18 years or over, of both sexes, with self-reported MA use at least once in the  
48 month prior to admission. The primary reasons for their hospitalization were MAP and/or  
49 MA use disorders. The Mini International Neuropsychiatric Interview (MINI) - Plus,  
50 Psychotic Module, was used to confirm a recent diagnosis of substance-induced psychotic  
51 disorder<sup>12</sup>. Based on the data elicited from this module, participants who developed  
52 psychosis prior to substance use and due to a general medical condition were excluded from  
53 the study.  
54  
55  
56  
57  
58  
59  
60

### *Assessment*

All clinical assessments were completed in a single day. As a cross-sectional study, this study had no follow-up visit. We assessed the participants when they were less likely to harm themselves or others. Apart from socio-demographic data, we interviewed each participant to elicit the pattern and history of MA use. We assessed the severity of depression and MA withdrawal using the 9-item Patient Health Questionnaire (PHQ-9) and the Amphetamine Withdrawal Questionnaire<sup>13,14</sup>. The Timeline Follow Back was used to determine days of MA use<sup>15</sup>. The severity of MA dependence, current psychotic symptoms, and cognitive impairment were assessed using the Severity of Dependence Scale (SDS)<sup>16</sup>, the 18-item Brief Psychiatric Rating Scale (BPRS)<sup>17</sup>, and the Montreal Cognitive Assessment (MoCA)<sup>18</sup>, respectively. We confirmed any diagnosis of alcohol and other substance use disorders and antisocial personality disorder using the MINI, alcohol use disorder, substance use disorders, and antisocial personality disorder modules, respectively<sup>12</sup>. In addition, the MINI, suicidality module was also used to assess the level of suicidal tendency.

Hair was collected from each participant during hospitalization. Scalp hair was cut close to the scalp from the vertex posterior region, with root ends marked, and kept in a clean plastic bag. The bag was then sealed with aluminum foil paper and shipped to the Department of Forensic Medicine, Chiang Mai University for quantitative hair analysis. The analysis for hair MA levels followed a previously published protocol involving solid-phase microextraction (SPME) in-line with gas-chromatography/mass-spectrometry (GC-MS)<sup>19</sup>. Derivatizing reagents for hair analysis were heptafluorobutyric chloride (HFBCl, 98% purity) and heptafluorobutyric anhydride (HFBA, 99% purity). Both reagents were purchased from Sigma-Aldrich (St. Louis, MO, USA). The limit of detection (LOD) and limit of quantitation (LOQ) for the present analysis were 0.10 and 0.15 ng/mg of hair, respectively.

MA concentration levels in the hair was the primary outcome measure. Other measures were considered as the secondary outcomes.

### *Statistical Analyses*

Our sample size calculation was based on the number of events per variable (NEV) in logistic regression analysis. We hypothesized that a maximum of 10 variables might be included in the final model of logistic regression analysis. Peduzzi and colleagues (1996) have proposed that a logistic regression model with an NEV of 10 or more would be less biased<sup>20</sup>. In this

1  
2  
3 study, we planned to enroll at least 100 patients with MAP and 100 patients without MAP. To  
4 compensate for some participants with incomplete data, we decided to enroll 120 patients for  
5 each group.  
6  
7  
8  
9

10 All missing data were considered as not available data. We present each variable as  
11 percentage, mean, and/or standard deviation. The association between each potential factor  
12 and MAP was assessed using a univariate analysis, including the Chi-square ( $\chi^2$ ) test for  
13 categorical data for all cell sizes  $>5$ , the Fisher's Exact test for categorical data for a cell size  
14  $\leq 5$ , and the Student's *t*-test for continuous data. Manual backward elimination, binary logistic  
15 regression analysis was used to identify the independent risks that showed a significant  
16 correlation with MAP. The first regression model included all univariate variables  
17 significantly correlated with MAP ( $p \leq 0.05$ ). The variable with the highest *p*-value of each  
18 regression model was then eliminated step by step. Only the risks significantly predicting  
19 MAP ( $p < 0.05$ ) were included in the final regression model. Odds ratios (OR) with  
20 corresponding 95% confidence intervals (CIs) and  $\beta$ 's were used to estimate the associations  
21 of nominal and continuous variables with MAP, respectively. The Hosmer and Lemeshow  
22 (H-L) test was applied, and its *p*-value of 0.05 or higher indicated that the model fitted well  
23 with the data. The variance inflation factors (VIFs) of each variable included in the final  
24 model were computed, and a VIF  $>10$  indicated that multicollinearity of the corresponding  
25 variable was high<sup>21</sup>. A *p*-value of less than 0.05 indicated a significant prediction. All  
26 reported *p*-values are two-sided.  
27  
28  
29  
30  
31  
32  
33  
34  
35  
36  
37  
38  
39  
40

41 All statistical analyses were done using R 3.5.1<sup>22</sup>. We used the Rcmdr 2.4-4 for univariate  
42 and multivariate analyses, the RcmdrPlugin.ROC 1.0-18 for testing the Hosmer and  
43 Lemeshow goodness of fit (GOF), and the rcompanion 1.13.2 for calculating the Nagelkerke  
44  $R^2$ <sup>23-25</sup>.  
45  
46  
47  
48  
49

#### 50 *Patient and public involvement*

51 Participants were not directly involved in the design of the study. The main results will be  
52 communicated to health professionals, who may need some predictors of MAP in their  
53 clinical practice.  
54  
55  
56  
57

## 58 **RESULTS**

1  
2  
3 A total number of participants were 120 participants with MAP and 120 participants without  
4 MAP. Of 120 participants without MAP, 11 of them were excluded because their hair tests  
5 were negative for MA.  
6  
7

8  
9  
10 The data of 233 participants were included in the analysis. The whole sample included 201  
11 males and 32 females who had a mean age (SD) of 28.3 (7.2) years, a mean of days since last  
12 use (SD) of 16.80 (9.27), a mean PHQ-9 score (SD) of 6.8 (4.5), and a mean AWQ score  
13 (SD) of 7.3 (5.4).  
14  
15  
16

17  
18  
19 Mean BPRS scores (SD) of the MAP group was 25.42 (6.47). Table 1 shows the  
20 demographic data and characteristics of both groups. Mean (SD) of MA concentration levels  
21 in the hair of the MAP group [13.68 ng/mg (25.95)] and that of the no MAP group [8.93  
22 ng/mg (24.66)] were not significantly different ( $p=0.115$ ). Mean (SD) MOCA scores of the  
23 MAP group [24.95 (2.96)] and no MAP groups [25.77 (3.23)] were significantly different ( $p$   
24 = 0.046).  
25  
26  
27  
28  
29

30  
31 [Insert Table 1 Here]  
32  
33

34 The univariate analysis revealed the association of MA psychosis and seven factors,  
35 including: being male, MA dependence, antisocial personality disorder, history of  
36 hospitalization for mental illnesses, history of hospitalization for substance abuse,  
37 intravenous use in the past month, MA use  $\geq 16$  days in the past month, and younger age at  
38 first use ( $p$ 's  $< 0.05$ ) (see Table 1). These seven factors were independent variables included  
39 in the first binary logistic regression analysis. After three steps of manual elimination of non-  
40 significant predictors, the final model included four risks that significantly predicted MA  
41 psychosis. These were being male, MA dependence, history of hospitalization for substance  
42 abuse, and MA use  $\geq 16$  days in the past month ( $p$ 's  $< 0.05$ ) (see Table 2). The H-L goodness  
43 of fit (GOF) test indicated no evidence of poor fit ( $\chi^2 = 1.39$ ,  $df = 8$ ,  $p = 0.99$ ). The VIFs of  
44 all four predictors were between 1.02 and 1.05.  
45  
46  
47  
48  
49  
50  
51  
52

53  
54  
55 [Insert Table 2 Here]  
56  
57

## 58 DISCUSSION

59  
60

1  
2  
3 This study examined risks of MAP in a clinical sample in which there was recent use of MA.  
4 The recent MA use and recent MAP were confirmed by using hair analysis and MINI-Plus,  
5 respectively. The low BPRS scores (mean=25.42) of the MAP group suggested that they  
6 were assessed after the recovery of psychosis. Risks of MA psychosis included being male,  
7 meeting the DSM-IV diagnosis of MA dependence, history of hospitalization for substance  
8 abuse, and using MA  $\geq 16$  days in the past month. However, the amount of MA use measured  
9 by hair analysis was not related with experience of MA psychosis.  
10  
11  
12  
13  
14  
15  
16

17 Although there have been many studies on the risks of MAP, only a few of them were carried  
18 out in MA users with a recent history of psychosis<sup>26-28</sup>. Although the mean level of hair MA  
19 in the MAP group was higher, the differences of these levels were not significant between  
20 groups. This finding was in contrast with that of a previous study reporting the association of  
21 MA amount of use and lifetime diagnosis of MAP<sup>29</sup>. Similar to the findings from two  
22 previous studies<sup>27,28</sup>, we did find a correlation between the frequency of recent MA use and  
23 the development of MAP. However, the previous and the present studies differ on at least two  
24 respects. While the previous studies assessed the association of self-reported MA use and  
25 lifetime MAP, our study examined the correlation between hair MA levels and recent MAP.  
26 If any future study confirms the present findings, that frequency but not amount of MA use  
27 predicts MAP, it would mean that frequency is more important than the amount of MA use in  
28 predicting MAP.  
29  
30  
31  
32  
33  
34  
35  
36  
37  
38

39 This study assessed MA dependence using two measures, the SDS and the DSM-IV diagnosis  
40 of MA dependence. Our finding that MA-dependent users had a higher risk of MAP than a  
41 MA abuser confirms a previous report<sup>30</sup>. In another study, the investigators found a  
42 correlation between MAP and MA dependence, defined by using a SDS score of 4 or more<sup>28</sup>.  
43 However, our study did not find a difference in SDS scores between groups. The discordance  
44 between the diagnosis of MA dependence and SDS scores may reflect that these two  
45 measures assess different aspects of MA dependence. The present finding that the history of  
46 hospitalization for substance use could predict MAP appears to be in concordance with the  
47 predictability of MA dependence.  
48  
49  
50  
51  
52  
53  
54  
55

56 Although a literature review did not find any correlation between sociodemographic  
57 characteristics and MAP<sup>11</sup>, our and previous studies did find that male MA users were more  
58 likely to experience MAP<sup>27</sup>. As two diseases in the same continuum<sup>31</sup>, the higher risk of  
59  
60

1  
2  
3 males for MAP appears to be in line with the findings that males are more likely than females  
4 to develop schizophrenia <sup>32</sup>.  
5  
6  
7

8 To our knowledge, this is the first study using hair analysis to confirm recent MA use and  
9 determine the amount of MA use. By using this objective test, we excluded the data of 11  
10 participants with negative results of hair analysis. The amount of MA use measured by hair  
11 analysis in this study should be more accurate than that calculated based on self-reporting <sup>29</sup>.  
12 The recent MAP diagnosed in this study was also confirmed using the MINI-Plus, Psychotic  
13 Module, which is a structure clinical interview widely used for diagnosis. By using the  
14 logistic regression, the predictors found in this study had already been adjusted by multiple  
15 variables.  
16  
17  
18  
19  
20  
21  
22  
23

24 There were several limitations of this study. Firstly, only few females, intravenous users, and  
25 those with a history of hospitalization for mental illnesses participated in this study. The  
26 present findings, therefore, could not apply in these populations. Secondly, the Nagelkerke  $R^2$   
27 (Cragg and Uhler) of 0.26 suggested that these four variables could explain 26% of the  
28 variance, which implied that some risks of MAP were not included in the study. Examples of  
29 risks reported in previous studies but not included in the present study are: polydrug use <sup>26</sup>;  
30 history of conduct, depressive, and anxiety disorders <sup>27</sup>; pre-morbid schizoid/schizotypal  
31 personality trait <sup>29</sup>; family history of psychotic disorders <sup>27</sup>; family history of schizophrenia  
32 and bipolar disorder <sup>33</sup>. Finally, based on the MOCA scores, the participants in this sample  
33 appeared to have mild cognitive impairment, which might affect the accuracy of reported  
34 data. Although the MOCA scores of the MAP group were significantly lower than those of  
35 the no MAP group, we did not include this variable in the logistic regression model. This  
36 decision was made because the poorer cognition in the MAP group might not be a risk but be  
37 a consequence of MAP.  
38  
39  
40  
41  
42  
43  
44  
45  
46  
47  
48  
49

50 Health professionals should closely monitor the development of MAP in MA-dependent men  
51 who frequently use MA and have a history of hospitalization for substance abuse. The  
52 measure of MA concentration levels in the hair may add no benefit for the prediction of the  
53 development of MAP. Future studies on the correlation between the amount of MA use and  
54 the development of MAP are warranted.  
55  
56  
57  
58  
59  
60

## Acknowledgments

We are grateful to Dr. Phunnapa Kittirattanapaiboon and Dr. Boonsiri Jansirimongkol for giving advice on this work, and Dr. Wiranpat Kittitharaphan for her administrative support.

## Contributors

WL conceived the idea of this work, collected the data, analyzed/interpreted the data, and drafted the article. KP, KI, AS, and NS conceived the idea of this work and collected the data. PS and AC conceived the idea of this work, collected the data, and drafted the article. MS conceived the idea of this work, analyzed/interpreted the data, and drafted the article. All authors critically revised the article and approved the final manuscript.

## Funding

This study was supported by a grant from the Department of Mental Health, Ministry of Public Health, Thailand. The sponsor had no role in the analysis and interpretation of data, the manuscript preparation or writing, and the decision to submit the manuscript.

## Competing interests

M.S. has received speaker's honorarium from Lundbeck and Sumitomo Dainippon Pharma. WL, KP, DI, AS, NS, PK, PS, and AJ declare no competing interests.

## Patient consent for publication

Not required

## Ethics approvals

Approval for this study was obtained from the local medical ethics committee 'Nakhon Phanom Rajanagarindra Psychiatric Hospital' under the project number 102/2558 on June 25, 2015.

## Provenance and peer review

Not commissioned, externally peer reviewed.

## Data sharing statement

No additional data from this study are available from a repository. Data are available on request from the corresponding author.

## REFERENCES

- 1 United Nations Office on Drugs and Crime. *World Drug Report 2018: Global Overview of Drug Demand and Supply (Booklet 2)*. United Nation Publication: Vienna, Austria, 2018.
- 2 United Nations Office on Drugs and Crime. *World Drug Report 2013*. United Nations: Vienna, 2013.
- 3 Alharbi F, el-Guebaly N. Cannabis and Amphetamine-type Stimulant-induced Psychoses: A Systematic Overview. *Addict Disord Their Treat* 2016; **15**: 190–200.
- 4 Srisurapanont M, Ali R, Marsden J, Sunga A, Wada K, Monteiro M. Psychotic symptoms in methamphetamine psychotic in-patients. *Int J Neuropsychopharmacol* 2003; **6**: 347–52.
- 5 Srisurapanont M, Arunpongpaisal S, Wada K, Marsden J, Ali R, Kongsakon R. Comparisons of methamphetamine psychotic and schizophrenic symptoms: a differential item functioning analysis. *Prog Neuropsychopharmacol Biol Psychiatry* 2011; **35**: 959–64.
- 6 McKetin R, Lubman DI, Najman JM, Dawe S, Butterworth P, Baker AL. Does methamphetamine use increase violent behaviour? Evidence from a prospective longitudinal study. *Addict Abingdon Engl* 2014; **109**: 798–806.
- 7 Glasner-Edwards S, Mooney LJ, Marinelli-Casey P, Hillhouse M, Ang A, Rawson R *et al*. Clinical course and outcomes of methamphetamine-dependent adults with psychosis. *J Subst Abuse Treat* 2008; **35**: 445–450.
- 8 Caton CLM, Drake RE, Hasin DS, Dominguez B, Shrout PE, Samet S *et al*. Differences between early-phase primary psychotic disorders with concurrent substance use and substance-induced psychoses. *Arch Gen Psychiatry* 2005; **62**: 137–145.
- 9 Kittirattanapaiboon P, Mahatnirunkul S, Booncharoen H, Thummawong P, Dumrongchai U, Chutha W. Long-term outcomes in methamphetamine psychosis patients after first hospitalisation. *Drug Alcohol Rev* 2010; **29**: 456–461.
- 10 Ujike H, Sato M. Clinical features of sensitization to methamphetamine observed in patients with methamphetamine dependence and psychosis. *Ann N Y Acad Sci* 2004; **1025**: 279–287.
- 11 Arunogiri S, Foulds JA, McKetin R, Lubman DI. A systematic review of risk factors for methamphetamine-associated psychosis. *Aust N Z J Psychiatry* 2018; **52**: 514–529.
- 12 Sheehan DV, Lecrubier Y, Sheehan KH, Amorim P, Janavs J, Weiller E *et al*. The Mini-International Neuropsychiatric Interview (M.I.N.I.): the development and validation of a

- 1  
2  
3 structured diagnostic psychiatric interview for DSM-IV and ICD-10. *J Clin Psychiatry*  
4 1998; **59 Suppl 20**: 22–33.
- 5  
6  
7 13 Kroenke K, Spitzer RL, Williams JB. The PHQ-9: validity of a brief depression severity  
8 measure. *J Gen Intern Med* 2001; **16**: 606–613.
- 9  
10  
11 14 Srisurapanont M, Jarusuraisin N, Jittiwutikan J. Amphetamine withdrawal: I. Reliability,  
12 validity and factor structure of a measure. *Aust N Z J Psychiatry* 1999; **33**: 89–93.
- 13  
14 15 Sobell LC, Sobell MB. Timeline Follow-Back. In: *Measuring Alcohol Consumption*.  
15 Humana Press, Totowa, NJ, 1992, pp 41–72.
- 16  
17 16 Gossop M, Darke S, Griffiths P, Hando J, Powis B, Hall W *et al*. The Severity of  
18 Dependence Scale (SDS): psychometric properties of the SDS in English and Australian  
19 samples of heroin, cocaine and amphetamine users. *Addict Abingdon Engl* 1995; **90**: 607–  
20 614.
- 21  
22  
23 17 Overall JE, Gorham DR. The Brief Psychiatric Rating Scale. *Psychol Rep* 1962; **10**: 799–  
24 812.
- 25  
26  
27 18 Nasreddine ZS, Phillips NA, Bédirian V, Charbonneau S, Whitehead V, Collin I *et al*.  
28 The Montreal Cognitive Assessment, MoCA: a brief screening tool for mild cognitive  
29 impairment. *J Am Geriatr Soc* 2005; **53**: 695–699.
- 30  
31  
32 19 Suwannachom N, Thananchai T, Junkuy A, O’Brien TE, Sribanditmongkol P. Duration  
33 of detection of methamphetamine in hair after abstinence. *Forensic Sci Int* 2015; **254**:  
34 80–86.
- 35  
36  
37 20 Peduzzi P, Concato J, Kemper E, Holford TR, Feinstein AR. A simulation study of the  
38 number of events per variable in logistic regression analysis. *J Clin Epidemiol* 1996; **49**:  
39 1373–1379.
- 40  
41  
42 21 Sheather S. *A Modern Approach to Regression with R*. Springer-Verlag: New York,  
43 2009//www.springer.com/gp/book/9780387096070 (accessed 21 Aug2018).
- 44  
45  
46 22 R Core Team. *A language and environment for statistical computing*. R Foundation for  
47 *Statistical Computing*. Vienna, Austria, 2018https://www.R-project.org/.
- 48  
49  
50 23 Daniel-Corneliu L. *RcmdrPlugin.ROC: Rcmdr Receiver Operator Characteristic Plug-In*  
51 *PACKAGE*. R package version 1.0-18. 2015https://CRAN.R-  
52 project.org/package=RcmdrPlugin.ROC.
- 53  
54  
55 24 Fox J. The R Commander: A Basic Statistics Graphical User Interface to R. *J Stat Softw*  
56 2005; **14**: 1–42.
- 57  
58  
59  
60

- 1  
2  
3  
4  
5  
6  
7  
8  
9  
10  
11  
12  
13  
14  
15  
16  
17  
18  
19  
20  
21  
22  
23  
24  
25  
26  
27  
28  
29  
30  
31  
32  
33  
34  
35  
36  
37  
38  
39  
40  
41  
42  
43  
44  
45  
46  
47  
48  
49  
50  
51  
52  
53  
54  
55  
56  
57  
58  
59  
60
- 25 Salvatore M. *rcompanion: Functions to Support Extension Education Program Evaluation. R package version 1.13.2*. 2018 <https://CRAN.R-project.org/package=rcompanion>.
  - 26 McKetin R, Hickey K, Devlin K, Lawrence K. The risk of psychotic symptoms associated with recreational methamphetamine use. *Drug Alcohol Rev* 2010; **29**: 358–363.
  - 27 McKetin R, Lubman DI, Baker AL, Dawe S, Ali RL. Dose-related psychotic symptoms in chronic methamphetamine users: evidence from a prospective longitudinal study. *JAMA Psychiatry* 2013; **70**: 319–324.
  - 28 McKetin R, McLaren J, Lubman DI, Hides L. The prevalence of psychotic symptoms among methamphetamine users. *Addict Abingdon Engl* 2006; **101**: 1473–1478.
  - 29 Chen CK, Lin SK, Sham PC, Ball D, Loh EW, Hsiao CC *et al*. Pre-morbid characteristics and co-morbidity of methamphetamine users with and without psychosis. *Psychol Med* 2003; **33**: 1407–1414.
  - 30 Smith MJ, Thirthalli J, Abdallah AB, Murray RM, Cottler LB. Prevalence of psychotic symptoms in substance users: a comparison across substances. *Compr Psychiatry* 2009; **50**: 245–250.
  - 31 Bramness JG, Gundersen ØH, Guterstam J, Rognli EB, Konstenius M, Løberg E-M *et al*. Amphetamine-induced psychosis - a separate diagnostic entity or primary psychosis triggered in the vulnerable? *BMC Psychiatry* 2012; **12**: 221.
  - 32 McGrath J, Saha S, Chant D, Welham J. Schizophrenia: A Concise Overview of Incidence, Prevalence, and Mortality. *Epidemiol Rev* 2008; **30**: 67–76.
  - 33 Hides L, Dawe S, McKetin R, Kavanagh DJ, Young RM, Teesson M *et al*. Primary and substance-induced psychotic disorders in methamphetamine users. *Psychiatry Res* 2015; **226**: 91–96.

**Table 1: Demographic and clinical characteristics of MA users with and without psychosis**

|                                                      | MA users without psychosis (N = 120) | MA users with psychosis (N=113) | Statistical analysis           |
|------------------------------------------------------|--------------------------------------|---------------------------------|--------------------------------|
|                                                      | n (%)                                | n (%)                           | Chi-Square/Fisher's Exact test |
| Gender: Male                                         | 95 (79.2)                            | 106 (93.8)                      | $\chi^2=9.33$<br>$p=0.002$     |
| MA use disorder                                      |                                      |                                 |                                |
| Abuse                                                | 18 (15.0)                            | 2 (1.8)                         | OR=9.72<br>$p<0.001$           |
| Dependence                                           | 102 (85)                             | 111 (98.2)                      |                                |
| Co-morbid alcohol use disorder (including lifetime)  | 52 (43.3)                            | 54 (47.8)                       | $\chi^2=0.303$<br>$p=0.582$    |
| Co-morbid cannabis use disorder (including lifetime) | 25 (20.8)                            | 33 (29.2)                       | $\chi^2=1.756$<br>$p=0.185$    |
| History of intravenous drug use                      | 4 (3.3)                              | 5 (4.4)                         | OR=1.34<br>$p=0.743$           |
| History of suicide attempt                           | 10 (8.3)                             | 17 (15.0)                       | $\chi^2=1.95$<br>$p=0.163$     |
| Antisocial personality disorder                      | 13 (10.8)                            | 27 (23.9)                       | $\chi^2=6.09$<br>$p=0.014$     |
| History of hospitalization for mental illnesses      | 1 (0.8)                              | 11 (9.7)                        | OR=12.73<br>$p=0.002$          |
| History of hospitalization for substance abuse       | 24 (20)                              | 52 (46)                         | $\chi^2=16.76$ $p<0.001$       |
| Most common route of MA use in the past month        |                                      |                                 |                                |
| Smoking                                              | 120 (100.0)                          | 107 (94.7)                      | OR=0.0<br>$p=0.012$            |

|                                         | MA users without psychosis (N = 120) | MA users with psychosis (N=113) | Statistical analysis         |
|-----------------------------------------|--------------------------------------|---------------------------------|------------------------------|
| Intravenous use                         | 0 (0.0)                              | 6 (5.3)                         |                              |
| ≥16 days of MA use in the past month    | 23 (19.2)                            | 41 (36.3)                       | $\chi^2=7.72$<br>$p=0.005$   |
|                                         |                                      |                                 |                              |
|                                         | <b>Mean (SD)</b>                     | <b>Mean (SD)</b>                | <b>Student <i>t</i>-test</b> |
| Age (years)                             | 27.8 (7.72)                          | 28.75 (6.65)                    | $t=1.006$ ,<br>$p=0.316$     |
| Age at first MA use (years)             | 19.04 (5.83)                         | 17.65 (4.31)                    | $t=2.068$ ,<br>$p=0.040$     |
| Severity of dependence (SDS score)      | 4.70 (2.34)                          | 5.08 (2.38)                     | $t=1.227$ ,<br>$p=0.221$     |
| Cognitive function (MoCA score)         | 25.77 (3.23)                         | 24.95 (2.96)                    | $t=2.01$ , $p=0.046$         |
| MA concentration levels in hair (ng/mg) | 18.93 (24.66)                        | 13.68 (25.95)                   | $t=1.582$ ,<br>$p=0.115$     |

MA: methamphetamine, SDS: Severity of Dependence Scale, MoCA: Montreal Cognitive Assessment

**Table 2 Manual backward elimination and binary logistic regression analysis to determine the risks for MA psychosis**

| Risk factor                                                                       | $\beta$  | SE   | Odds ratio (95% confidence interval) |
|-----------------------------------------------------------------------------------|----------|------|--------------------------------------|
| Intercept                                                                         | -4.05*** | 0.91 | 0.02 (0.00-0.10)                     |
| Male (vs. female)                                                                 | 1.39**   | 0.48 | 4.03 (1.59-10.20)                    |
| MA dependence (vs. MA abuse)                                                      | 2.24**   | 0.79 | 9.41 (2.01- 44.00)                   |
| History of hospitalization for substance abuse (vs. no history)                   | 1.35***  | 0.33 | 3.85 (2.03-7.28)                     |
| $\geq 16$ days of MA use in the past month (vs. $\leq 15$ days in the past month) | 0.86*    | 0.33 | 2.35 (1.22-4.52)                     |

MA: methamphetamine

\*\*\* $p < 0.001$ ; \*\* $p < 0.01$ ; \* $p < 0.05$ .

Nagelkerke  $R^2$  (Cragg and Uhler) = 0.26

Hosmer and Lemeshow goodness of fit (GOF) test:  $\chi^2 = 1.39$ ,  $df = 8$ ,  $p$ -value = 0.99

# Reporting checklist for cross sectional study.

Based on the STROBE cross sectional guidelines.

## Instructions to authors

Complete this checklist by entering the page numbers from your manuscript where readers will find each of the items listed below.

Your article may not currently address all the items on the checklist. Please modify your text to include the missing information. If you are certain that an item does not apply, please write "n/a" and provide a short explanation.

Upload your completed checklist as an extra file when you submit to a journal.

In your methods section, say that you used the STROBE cross sectional reporting guidelines, and cite them as:

von Elm E, Altman DG, Egger M, Pocock SJ, Gøtzsche PC, Vandenbroucke JP. The Strengthening the Reporting of Observational Studies in Epidemiology (STROBE) Statement: guidelines for reporting observational studies.

|                           |                     | Reporting Item                                                                                  | Page Number |
|---------------------------|---------------------|-------------------------------------------------------------------------------------------------|-------------|
| <b>Title and abstract</b> |                     |                                                                                                 |             |
| Title                     | <a href="#">#1a</a> | Indicate the study's design with a commonly used term in the title or the abstract              | 1           |
| Abstract                  | <a href="#">#1b</a> | Provide in the abstract an informative and balanced summary of what was done and what was found | 2           |
| <b>Introduction</b>       |                     |                                                                                                 |             |
| Background / rationale    | <a href="#">#2</a>  | Explain the scientific background and rationale for the investigation being reported            | 4-5         |
| Objectives                | <a href="#">#3</a>  | State specific objectives, including any prespecified hypotheses                                | 5           |
| <b>Methods</b>            |                     |                                                                                                 |             |
| Study design              | <a href="#">#4</a>  | Present key elements of study design early in the paper                                         | 5           |
| Setting                   | <a href="#">#5</a>  | Describe the setting, locations, and relevant dates, including periods of                       | 5           |

|    |                      |                                                                                                |     |
|----|----------------------|------------------------------------------------------------------------------------------------|-----|
|    |                      | recruitment, exposure, follow-up, and data collection                                          |     |
| 1  |                      |                                                                                                |     |
| 2  | Eligibility criteria | <a href="#">#6a</a> Give the eligibility criteria, and the sources and methods of selection of | 5   |
| 3  |                      | participants.                                                                                  |     |
| 4  |                      |                                                                                                |     |
| 5  |                      |                                                                                                |     |
| 6  |                      | <a href="#">#7</a> Clearly define all outcomes, exposures, predictors, potential               | 6   |
| 7  |                      | confounders, and effect modifiers. Give diagnostic criteria, if applicable                     |     |
| 8  |                      |                                                                                                |     |
| 9  |                      |                                                                                                |     |
| 10 | Data sources /       | <a href="#">#8</a> For each variable of interest give sources of data and details of methods   | 6   |
| 11 | measurement          | of assessment (measurement). Describe comparability of assessment                              |     |
| 12 |                      | methods if there is more than one group. Give information separately                           |     |
| 13 |                      | for for exposed and unexposed groups if applicable.                                            |     |
| 14 |                      |                                                                                                |     |
| 15 |                      |                                                                                                |     |
| 16 |                      |                                                                                                |     |
| 17 | Bias                 | <a href="#">#9</a> Describe any efforts to address potential sources of bias                   | 5   |
| 18 |                      |                                                                                                |     |
| 19 | Study size           | <a href="#">#10</a> Explain how the study size was arrived at                                  | 6-7 |
| 20 |                      |                                                                                                |     |
| 21 | Quantitative         | <a href="#">#11</a> Explain how quantitative variables were handled in the analyses. If        | 7   |
| 22 | variables            | applicable, describe which groupings were chosen, and why                                      |     |
| 23 |                      |                                                                                                |     |
| 24 |                      |                                                                                                |     |
| 25 | Statistical          | <a href="#">#12a</a> Describe all statistical methods, including those used to control for     | 7   |
| 26 | methods              | confounding                                                                                    |     |
| 27 |                      |                                                                                                |     |
| 28 |                      |                                                                                                |     |
| 29 | Statistical          | <a href="#">#12b</a> Describe any methods used to examine subgroups and interactions           | 7   |
| 30 | methods              |                                                                                                |     |
| 31 |                      |                                                                                                |     |
| 32 |                      |                                                                                                |     |
| 33 | Statistical          | <a href="#">#12c</a> Explain how missing data were addressed                                   | 7   |
| 34 | methods              |                                                                                                |     |
| 35 |                      |                                                                                                |     |
| 36 |                      |                                                                                                |     |
| 37 | Statistical          | <a href="#">#12d</a> If applicable, describe analytical methods taking account of sampling     | N/A |
| 38 | methods              | strategy                                                                                       |     |
| 39 |                      |                                                                                                |     |
| 40 |                      |                                                                                                |     |
| 41 | Statistical          | <a href="#">#12e</a> Describe any sensitivity analyses                                         | N/A |
| 42 | methods              |                                                                                                |     |
| 43 |                      |                                                                                                |     |
| 44 | <b>Results</b>       |                                                                                                |     |
| 45 |                      |                                                                                                |     |
| 46 | Participants         | <a href="#">#13a</a> Report numbers of individuals at each stage of study—eg numbers           | 8   |
| 47 |                      | potentially eligible, examined for eligibility, confirmed eligible,                            |     |
| 48 |                      | included in the study, completing follow-up, and analysed. Give                                |     |
| 49 |                      | information separately for for exposed and unexposed groups if                                 |     |
| 50 |                      | applicable.                                                                                    |     |
| 51 |                      |                                                                                                |     |
| 52 |                      |                                                                                                |     |
| 53 |                      |                                                                                                |     |
| 54 |                      |                                                                                                |     |
| 55 | Participants         | <a href="#">#13b</a> Give reasons for non-participation at each stage                          | 8   |
| 56 |                      |                                                                                                |     |
| 57 | Participants         | <a href="#">#13c</a> Consider use of a flow diagram                                            | N/A |
| 58 |                      |                                                                                                |     |
| 59 |                      |                                                                                                |     |
| 60 |                      |                                                                                                |     |

|    |                    |                      |                                                                                                                                                                                                                   |       |
|----|--------------------|----------------------|-------------------------------------------------------------------------------------------------------------------------------------------------------------------------------------------------------------------|-------|
| 1  | Descriptive data   | <a href="#">#14a</a> | Give characteristics of study participants (eg demographic, clinical, social) and information on exposures and potential confounders. Give information separately for exposed and unexposed groups if applicable. | 15    |
| 2  |                    |                      |                                                                                                                                                                                                                   |       |
| 3  |                    |                      |                                                                                                                                                                                                                   |       |
| 4  |                    |                      |                                                                                                                                                                                                                   |       |
| 5  |                    |                      |                                                                                                                                                                                                                   |       |
| 6  | Descriptive data   | <a href="#">#14b</a> | Indicate number of participants with missing data for each variable of interest                                                                                                                                   | 8     |
| 7  |                    |                      |                                                                                                                                                                                                                   |       |
| 8  |                    |                      |                                                                                                                                                                                                                   |       |
| 9  |                    |                      |                                                                                                                                                                                                                   |       |
| 10 | Outcome data       | <a href="#">#15</a>  | Report numbers of outcome events or summary measures. Give information separately for exposed and unexposed groups if applicable.                                                                                 | 15    |
| 11 |                    |                      |                                                                                                                                                                                                                   |       |
| 12 |                    |                      |                                                                                                                                                                                                                   |       |
| 13 |                    |                      |                                                                                                                                                                                                                   |       |
| 14 | Main results       | <a href="#">#16a</a> | Give unadjusted estimates and, if applicable, confounder-adjusted estimates and their precision (eg, 95% confidence interval). Make clear which confounders were adjusted for and why they were included          | 8, 16 |
| 15 |                    |                      |                                                                                                                                                                                                                   |       |
| 16 |                    |                      |                                                                                                                                                                                                                   |       |
| 17 |                    |                      |                                                                                                                                                                                                                   |       |
| 18 |                    |                      |                                                                                                                                                                                                                   |       |
| 19 | Main results       | <a href="#">#16b</a> | Report category boundaries when continuous variables were categorized                                                                                                                                             | 8, 16 |
| 20 |                    |                      |                                                                                                                                                                                                                   |       |
| 21 | Main results       | <a href="#">#16c</a> | If relevant, consider translating estimates of relative risk into absolute risk for a meaningful time period                                                                                                      | N/A   |
| 22 |                    |                      |                                                                                                                                                                                                                   |       |
| 23 |                    |                      |                                                                                                                                                                                                                   |       |
| 24 |                    |                      |                                                                                                                                                                                                                   |       |
| 25 | Other analyses     | <a href="#">#17</a>  | Report other analyses done—e.g., analyses of subgroups and interactions, and sensitivity analyses                                                                                                                 | N/A   |
| 26 |                    |                      |                                                                                                                                                                                                                   |       |
| 27 |                    |                      |                                                                                                                                                                                                                   |       |
| 28 |                    |                      |                                                                                                                                                                                                                   |       |
| 29 | <b>Discussion</b>  |                      |                                                                                                                                                                                                                   |       |
| 30 |                    |                      |                                                                                                                                                                                                                   |       |
| 31 | Key results        | <a href="#">#18</a>  | Summarise key results with reference to study objectives                                                                                                                                                          | 9     |
| 32 |                    |                      |                                                                                                                                                                                                                   |       |
| 33 |                    |                      |                                                                                                                                                                                                                   |       |
| 34 | Limitations        | <a href="#">#19</a>  | Discuss limitations of the study, taking into account sources of potential bias or imprecision. Discuss both direction and magnitude of any potential bias.                                                       | 10    |
| 35 |                    |                      |                                                                                                                                                                                                                   |       |
| 36 |                    |                      |                                                                                                                                                                                                                   |       |
| 37 |                    |                      |                                                                                                                                                                                                                   |       |
| 38 |                    |                      |                                                                                                                                                                                                                   |       |
| 39 | Interpretation     | <a href="#">#20</a>  | Give a cautious overall interpretation considering objectives, limitations, multiplicity of analyses, results from similar studies, and other relevant evidence.                                                  | 10    |
| 40 |                    |                      |                                                                                                                                                                                                                   |       |
| 41 |                    |                      |                                                                                                                                                                                                                   |       |
| 42 |                    |                      |                                                                                                                                                                                                                   |       |
| 43 |                    |                      |                                                                                                                                                                                                                   |       |
| 44 | Generalisability   | <a href="#">#21</a>  | Discuss the generalisability (external validity) of the study results                                                                                                                                             | 10    |
| 45 |                    |                      |                                                                                                                                                                                                                   |       |
| 46 |                    |                      |                                                                                                                                                                                                                   |       |
| 47 | <b>Other</b>       |                      |                                                                                                                                                                                                                   |       |
| 48 | <b>Information</b> |                      |                                                                                                                                                                                                                   |       |
| 49 |                    |                      |                                                                                                                                                                                                                   |       |
| 50 |                    |                      |                                                                                                                                                                                                                   |       |
| 51 | Funding            | <a href="#">#22</a>  | Give the source of funding and the role of the funders for the present study and, if applicable, for the original study on which the present article is based                                                     | 11    |
| 52 |                    |                      |                                                                                                                                                                                                                   |       |
| 53 |                    |                      |                                                                                                                                                                                                                   |       |
| 54 |                    |                      |                                                                                                                                                                                                                   |       |
| 55 |                    |                      |                                                                                                                                                                                                                   |       |

The STROBE checklist is distributed under the terms of the Creative Commons Attribution License CC-BY.

This checklist was completed on 01. July 2019 using <https://www.goodreports.org/>, a tool made by the

[EQUATOR Network](#) in collaboration with [Penelope.ai](#)

For peer review only - <http://bmjopen.bmj.com/site/about/guidelines.xhtml>

# BMJ Open

## Risks of psychosis in methamphetamine users: a cross-sectional study in Thailand

|                                 |                                                                                                                                                                                                                                                                                                                                                                                                                                                                                                                                                                                                                                                                                                                                                                                                                                                                                                                                                                                                                                                                                                        |
|---------------------------------|--------------------------------------------------------------------------------------------------------------------------------------------------------------------------------------------------------------------------------------------------------------------------------------------------------------------------------------------------------------------------------------------------------------------------------------------------------------------------------------------------------------------------------------------------------------------------------------------------------------------------------------------------------------------------------------------------------------------------------------------------------------------------------------------------------------------------------------------------------------------------------------------------------------------------------------------------------------------------------------------------------------------------------------------------------------------------------------------------------|
| Journal:                        | <i>BMJ Open</i>                                                                                                                                                                                                                                                                                                                                                                                                                                                                                                                                                                                                                                                                                                                                                                                                                                                                                                                                                                                                                                                                                        |
| Manuscript ID                   | bmjopen-2019-032711.R1                                                                                                                                                                                                                                                                                                                                                                                                                                                                                                                                                                                                                                                                                                                                                                                                                                                                                                                                                                                                                                                                                 |
| Article Type:                   | Original research                                                                                                                                                                                                                                                                                                                                                                                                                                                                                                                                                                                                                                                                                                                                                                                                                                                                                                                                                                                                                                                                                      |
| Date Submitted by the Author:   | 16-Aug-2019                                                                                                                                                                                                                                                                                                                                                                                                                                                                                                                                                                                                                                                                                                                                                                                                                                                                                                                                                                                                                                                                                            |
| Complete List of Authors:       | Lamyai, Warot; Royal Thai Government Ministry of Public Health, Nakhon Phanom Rajanagarindra Psychiatric Hospital, Department of Mental Health,<br>Pono, Kitkawe; Royal Thai Government Ministry of Public Health, Nakhon Phanom Rajanagarindra Psychiatric Hospital, Department of Mental Health,<br>Indrakamhaeng, Danai; Royal Thai Government Ministry of Public Health, Thanyarak Chiang Mai Hospital, Department of Medical Services, Saengsin, Apichat; Royal Thai Government Ministry of Public Health Songhong, Nartya ; Royal Thai Government Ministry of Public Health, Songkhla Rajanagarindra Psychiatric Hospital, Department of Mental Health,<br>Khuwuthyakorn, Panu ; Royal Thai Government Ministry of Public Health, Suanprung Psychiatric Hospital, Department of Mental Health, Sribanditmongkol, Pongruk; Chiang Mai University Faculty of Medicine, Department of Forensic Medicine<br>Junkuy, Anongphan; Chiang Mai University Faculty of Medicine, Department of Forensic Medicine<br>Srisurapanont , M ; Chiang Mai University Faculty of Medicine, Department of Psychiatry |
| <b>Primary Subject Heading</b>: | Mental health                                                                                                                                                                                                                                                                                                                                                                                                                                                                                                                                                                                                                                                                                                                                                                                                                                                                                                                                                                                                                                                                                          |
| Secondary Subject Heading:      | Addiction                                                                                                                                                                                                                                                                                                                                                                                                                                                                                                                                                                                                                                                                                                                                                                                                                                                                                                                                                                                                                                                                                              |
| Keywords:                       | Schizophrenia & psychotic disorders < PSYCHIATRY, Substance misuse < PSYCHIATRY, Adult psychiatry < PSYCHIATRY, amphetamine, stimulant, psychotic disorder                                                                                                                                                                                                                                                                                                                                                                                                                                                                                                                                                                                                                                                                                                                                                                                                                                                                                                                                             |
|                                 |                                                                                                                                                                                                                                                                                                                                                                                                                                                                                                                                                                                                                                                                                                                                                                                                                                                                                                                                                                                                                                                                                                        |

SCHOLARONE™  
Manuscripts

# Risks of psychosis in methamphetamine users: a cross-sectional study in Thailand

**Authors:** Warot Lamyai,<sup>1</sup> Kitkawe Pono,<sup>1</sup> Danai Indrakamhaeng,<sup>2</sup> Apichat Saengsin,<sup>3</sup> Nartya Songhong,<sup>4</sup> Panu Khuwuthyakorn,<sup>5</sup> Pongruk Sribanditmongkol,<sup>6</sup> Anongphan Junkuy,<sup>6</sup> Manit Srisurapanont,<sup>7\*</sup>

## Affiliations:

<sup>1</sup> Nakhon Phanom Rajanagarindra Psychiatric Hospital, Department of Mental Health, Ministry of Public Health, Thailand

<sup>2</sup> Thanyarak Chiang Mai Hospital, Department of Medical Services, Ministry of Public Health, Thailand

<sup>3</sup> Galyarajanagarindra Institute, Department of Mental Health, Ministry of Public Health, Thailand

<sup>4</sup> Songkhla Rajanagarindra Psychiatric Hospital, Department of Mental Health, Ministry of Public Health, Thailand

<sup>5</sup> Suanprung Psychiatric Hospital, Department of Mental Health, Ministry of Public Health, Thailand

<sup>6</sup> Department of Forensic Medicine, Faculty of Medicine, Chiang Mai University, Chiang Mai, Thailand

<sup>7</sup> Department of Psychiatry, Faculty of Medicine, Chiang Mai University, Chiang Mai, Thailand

\*Correspondence to:

Dr. Mani Srisurapanont; manit.s@cmu.ac.th (ORCID ID: 0000-0001-6203-1206)

**Word count:** 2,832 words of text (not including 287 words of abstract, 34 references, and 2 tables).

## ABSTRACT

**Objective:** To determine factors related to recent methamphetamine-associated psychosis (MAP) among individuals recently using methamphetamine (MA).

**Design:** Cross-sectional study carried out between July 2015 and June 2017.

**Setting:** Four mental health hospitals and one substance abuse treatment center in Thailand.

**Participants:** Individuals recruited onto the study included those aged 18 years or more, of both sexes, who reported MA use in the month prior to admission.

**Measures:** Any recent psychosis was confirmed using the Mini International Neuropsychiatric Interview – Plus, Psychotic Module. The Timeline Follow Back was used to determine days of MA use. The severity of MA dependence was assessed using the Severity of Dependence Scale (SDS). Quantitative hair analysis was carried out to confirm recent use of MA and measure the amount of MA use. We compared several characteristics between those who had recently experienced psychosis and those who had not.

**Results:** This study included 120 participants without MAP and 113 participants with MAP. The mean age was 28 years and mean abstinence was 17 days. The levels of MA concentration in hair were not significantly different between groups ( $p = 0.115$ ). Based on the final logistic regression model, the independent factors associated with MAP (odds ratio, 95% confidence interval) included being male (OR 4.03, 95% CI 1.59-10.20),  $\geq 16$  days of MA use in the past month (OR 2.35, 95% CI 1.22-4.52), MA dependence (OR 9.41, 95% CI 2.01-44.00), hospitalization history related to substance abuse (OR 3.85, 95% CI 2.03-7.28).

**Conclusions:** Health professionals should closely monitor the development of MAP in MA-dependent men who frequently use MA and have a history of hospitalization for substance abuse. The measure of MA concentration levels in the hair may add no benefit for the prediction of the development of MAP.

**Key words:** amphetamine, stimulant, psychotic disorder, predictor, factor

## ARTICLE SUMMARY

### Strengths and limitations of this study

- This study examined risks of recent methamphetamine-associated psychosis (MAP) in a clinical sample in which there was recent use of methamphetamine (MA).
- This study used MA concentration levels in the hair to confirm recent MA use and determine the amount of MA use.
- This study used a structure clinical interview for diagnosis to confirm a recent diagnosis of substance-induced psychotic disorder.
- This is a cross-sectional study.
- Some risks of MAP were not included in the study, e.g., polydrug use; history of conduct, depressive, and anxiety disorders; pre-morbid schizoid/schizotypal personality trait; family history of psychotic disorders; family history of schizophrenia and bipolar disorder.

## INTRODUCTION

Methamphetamine-associated psychosis (MAP) is an increasing health problem.

Amphetamines are one of the most common drug use in East and Southeast Asia. In 2016, an estimated 34.2 million people worldwide used amphetamines in the past year <sup>1</sup>. In its class, methamphetamine (MA), a very potent amphetamine derivative, is the most frequently used substance <sup>2</sup>. Between 21 and 46% of MA users are likely to develop psychosis at least once in a lifetime <sup>3</sup>. Based on these estimations, MAP may currently affect millions of people around the world.

The symptoms of MAP are similar to those of schizophrenia and are associated with serious negative consequences. Its common symptoms include auditory hallucinations, visual hallucinations, strange or unusual beliefs, persecutory delusion, and negative psychotic symptoms, which cannot be distinguished from schizophrenic psychotic symptoms <sup>4,5</sup>. These psychotic symptoms usually cause anxiety, fear, terror, and decreased behavioral control. Case of severe psychosis can lead to unpredictable episodes of aggression and violence. Previous studies found that MA users with psychotic symptoms had a higher risk of violent behavior than MA users who had no psychotic symptoms <sup>6</sup>. Other than the more frequent utilization of health services and attempted suicide, MA users with MAP are more likely to have medical, employment, and legal problems than those without MAP <sup>7</sup>. The findings from long-term studies also suggested that 25-38% of individuals with MAP may develop primary or persistent psychosis some time in later life <sup>8,9</sup>.

Because a subset of MA users may develop psychotic symptoms, important questions are raised about MA users who may have an increased risk of MAP. Previous studies suggest that MAP is associated with a number of MA use patterns and psychiatric comorbidities. In early Japanese studies, in which most users exclusively used MA (1955-1992), the investigators found an association between frequent and long-term use of MA and MAP <sup>10</sup>. Based on a recent review, replicated risks factors included early age MA use, frequent and long-term use of MA, MA dependence, alcohol and other drug use, major depressive disorders, and antisocial personality disorders <sup>11</sup>. That review found no association between sociodemographic factors and MAP. In addition, some risk factors are not yet clear, e.g., other drug use, psychiatric co-morbidity, family history of psychiatric illness, childhood trauma.

1  
2  
3 Despite the increasing evidence around risk factors of MAP, there are some limitations in  
4 previous studies. Firstly, many studies were carried out using patients with a life-time history  
5 of MA use and/or MAP. The results of these studies may be less reliable because the  
6 participants may not have been able to recall those experiences accurately. Secondly, some of  
7 them did not exclude individuals with primary psychotic disorders prior to MA use. Lastly,  
8 most studies did not use a valid method to confirm or measure the amount of MA use. For  
9 these reasons, we proposed to carry out a cross-sectional study to determine the risks of  
10 psychosis in Thai people who recently used MA and had recently experienced MAP. This  
11 studied population was chosen to minimize the problems of inaccurate recalls on MA use and  
12 MAP experience. We hypothesized that a number of patients' characteristics, including the  
13 amount of MA in hair of the users, should be used as predictors of MAP.  
14  
15  
16  
17  
18  
19  
20  
21  
22  
23

## 24 **METHODS**

25 This cross-sectional study was carried out in MA users admitted to four mental health  
26 hospitals and one substance abuse treatment center in Thailand. Suanprung Psychiatric  
27 Hospital and Thanyarak Chiang Mai Hospital are located in Northern Thailand. Nakhon  
28 Phanom Rajanagarindra Psychiatric Hospital is located in Northeastern Thailand. The  
29 Galyarajanagarindra Institute is located in Central Thailand. Songkhla Rajanagarindra  
30 Psychiatric Hospital is located in Southern Thailand. The Ethics Committee (EC) for Human  
31 Research of the Ministry of Public Health approved the study protocol for Thanyarak Chiang  
32 Mai Hospital, Nakhon Phanom Rajanagarindra Psychiatric Hospital, and Songkhla  
33 Rajanagarindra Psychiatric Hospital. Each EC for Human Research of Suanprung Psychiatric  
34 Hospital and Galyarajanagarindra Institute approved the study protocol at its site. All the  
35 participants provided written informed consent prior to participation in the studies. All  
36 methods used in the study were performed in accordance with the guidelines given and the  
37 regulation agreed with the ECs. This study carried out between July 2015 and June 2017  
38  
39  
40  
41  
42  
43  
44  
45  
46  
47  
48  
49

### 50 *Participants*

51 We assessed 120 MA users with MAP and 120 MA user without MAP. Participants included  
52 those aged 18 years or over, of both sexes, with self-reported MA use at least once in the  
53 month prior to admission. The primary reasons for their hospitalization were MAP and/or  
54 MA use disorders. The Mini International Neuropsychiatric Interview (MINI) - Plus,  
55 Psychotic Module, was used to confirm a recent diagnosis of substance-induced psychotic  
56 disorder<sup>12</sup>. Based on the data elicited from this module, participants who developed  
57  
58  
59  
60

1  
2  
3 psychosis prior to substance use and due to a general medical condition were excluded from  
4 the study.  
5  
6  
7

### 8 *Assessment*

9  
10 All clinical assessments were completed in a single day. As a cross-sectional study, this study  
11 had no follow-up visit. We assessed the participants when they were less likely to harm  
12 themselves or others. Apart from socio-demographic data, we interviewed each participant to  
13 elicit the pattern and history of MA use. We assessed the severity of depression and MA  
14 withdrawal using the 9-item Patient Health Questionnaire (PHQ-9) and the Amphetamine  
15 Withdrawal Questionnaire<sup>13,14</sup>. The Timeline Follow Back was used to determine days of  
16 MA use<sup>15</sup>. The severity of MA dependence, current psychotic symptoms, and cognitive  
17 impairment were assessed using the Severity of Dependence Scale (SDS)<sup>16</sup>, the 18-item  
18 Brief Psychiatric Rating Scale (BPRS)<sup>17</sup>, and the Montreal Cognitive Assessment (MoCA)  
19<sup>18</sup>, respectively. We confirmed any diagnosis of alcohol and other substance use disorders and  
20 antisocial personality disorder using the MINI, alcohol use disorder, substance use disorders,  
21 and antisocial personality disorder modules, respectively<sup>12</sup>. In addition, the MINI, suicidality  
22 module was also used to assess the level of suicidal tendency.  
23  
24  
25  
26  
27  
28  
29  
30  
31  
32  
33

34 Hair was collected from each participant during hospitalization. Scalp hair was cut close to  
35 the scalp from the vertex posterior region, with root ends marked, and kept in a clean plastic  
36 bag. The bag was then sealed with aluminum foil paper and shipped to the Department of  
37 Forensic Medicine, Chiang Mai University for quantitative hair analysis. The analysis for hair  
38 MA levels followed a previously published protocol involving solid-phase microextraction  
39 (SPME) in-line with gas-chromatography/mass-spectrometry (GC-MS)<sup>19</sup>. Derivatizing  
40 reagents for hair analysis were heptafluorobutyric chloride (HFBCl, 98% purity) and  
41 heptafluorobutyric anhydride (HFBA, 99% purity). Both reagents were purchased from  
42 Sigma-Aldrich (St. Louis, MO, USA). The limit of detection (LOD) and limit of quantitation  
43 (LOQ) for the present analysis were 0.10 and 0.15 ng/mg of hair, respectively.  
44  
45  
46  
47  
48  
49  
50  
51  
52

53 MA concentration levels in the hair was the primary outcome measure. Other measures were  
54 considered as the secondary outcomes.  
55  
56  
57

### 58 *Statistical Analyses*

1  
2  
3 Our sample size calculation was based on the number of events per variable (NEV) in logistic  
4 regression analysis. We hypothesized that a maximum of 10 variables might be included in  
5 the final model of logistic regression analysis. Peduzzi and colleagues (1996) have proposed  
6 that a logistic regression model with an NEV of 10 or more would be less biased<sup>20</sup>. In this  
7 study, we planned to enroll at least 100 patients with MAP and 100 patients without MAP. To  
8 compensate for some participants with incomplete data, we decided to enroll 120 patients for  
9 each group.  
10  
11  
12  
13  
14  
15  
16

17 All missing data were considered as not available data. We present each variable as  
18 percentage, mean, and/or standard deviation. The association between each potential factor  
19 and MAP was assessed using a univariate analysis, including the Chi-square ( $\chi^2$ ) test for  
20 categorical data for all cell sizes  $>5$ , the Fisher's Exact test for categorical data for a cell size  
21  $\leq 5$ , and the Student's *t*-test for continuous data. Manual backward elimination, binary logistic  
22 regression analysis was used to identify the independent risks that showed a significant  
23 correlation with MAP. The first regression model included all univariate variables  
24 significantly correlated with MAP ( $p \leq 0.05$ ). The variable with the highest *p*-value of each  
25 regression model was then eliminated step by step. Only the risks significantly predicting  
26 MAP ( $p < 0.05$ ) were included in the final regression model. Odds ratios (OR) with  
27 corresponding 95% confidence intervals (CIs) and  $\beta$ 's were used to estimate the associations  
28 of nominal and continuous variables with MAP, respectively. The Hosmer and Lemeshow  
29 (H-L) test was applied, and its *p*-value of 0.05 or higher indicated that the model fitted well  
30 with the data. The variance inflation factors (VIFs) of each variable included in the final  
31 model were computed, and a VIF  $>10$  indicated that multicollinearity of the corresponding  
32 variable was high<sup>21</sup>. A *p*-value of less than 0.05 indicated a significant prediction. All  
33 reported *p*-values are two-sided.  
34  
35  
36  
37  
38  
39  
40  
41  
42  
43  
44  
45  
46  
47

48 All statistical analyses were done using R 3.5.1<sup>22</sup>. We used the Rcmdr 2.4-4 for univariate  
49 and multivariate analyses, the RcmdrPlugin.ROC 1.0-18 for testing the Hosmer and  
50 Lemeshow goodness of fit (GOF), and the rcompanion 1.13.2 for calculating the Nagelkerke  
51  $R^2$ <sup>23-25</sup>.  
52  
53  
54  
55  
56

### 57 *Patient and public involvement*

58  
59  
60

1  
2  
3 Participants were not directly involved in the design of the study. The main results will be  
4 communicated to health professionals, who may need some predictors of MAP in their  
5 clinical practice.  
6  
7  
8  
9

## 10 RESULTS

11 A total number of participants were 120 participants with MAP and 120 participants without  
12 MAP. Of 120 participants with MAP, 7 of them were excluded because their hair tests were  
13 negative for MA.  
14  
15  
16

17  
18 The data of 233 participants were included in the analysis. The whole sample included 201  
19 males and 32 females who had a mean age (SD) of 28.3 (7.2) years, a mean of days since last  
20 use (SD) of 16.80 (9.27), a mean PHQ-9 score (SD) of 6.8 (4.5), and a mean AWQ score  
21 (SD) of 7.3 (5.4).  
22  
23  
24  
25

26  
27 Mean BPRS scores (SD) of the MAP group was 25.42 (6.47). Table 1 shows the  
28 demographic data and characteristics of both groups. Mean (SD) of MA concentration levels  
29 in the hair of the MAP group [13.68 ng/mg (25.95)] and that of the no MAP group [8.93  
30 ng/mg (24.66)] were not significantly different ( $p=0.115$ ). The MA concentration levels in  
31 the hair and the BPRS scores were not significantly correlated in both MAP group  
32 (Spearman's Rho = 0.160,  $p = 0.091$ ) and no MAP group (Spearman's Rho = 0.031,  $p =$   
33 0.736). Mean (SD) MOCA scores of the MAP group [24.95 (2.96)] and no MAP groups  
34 [25.77 (3.23)] were significantly different ( $p = 0.046$ ).  
35  
36  
37  
38  
39  
40  
41  
42

43 [Insert Table 1 Here]  
44  
45

46 The univariate analysis revealed the association of MA psychosis and eight factors,  
47 including: being male, MA dependence, antisocial personality disorder, history of  
48 hospitalization for mental illnesses, history of hospitalization for substance abuse,  
49 intravenous use in the past month, MA use  $\geq 16$  days in the past month, and younger age at  
50 first use ( $p$ 's  $< 0.05$ ) (see Table 1). These eight factors were independent variables included in  
51 the first binary logistic regression analysis. After four steps of manual elimination of non-  
52 significant predictors, the final model included four risks that significantly predicted MA  
53 psychosis. These were being male, MA dependence, history of hospitalization for substance  
54 abuse, and MA use  $\geq 16$  days in the past month ( $p$ 's  $< 0.05$ ) (see Table 2). The H-L goodness  
55  
56  
57  
58  
59  
60

1  
2  
3 of fit (GOF) test indicated no evidence of poor fit ( $\chi^2 = 1.39$ ,  $df = 8$ ,  $p = 0.99$ ). The VIFs of  
4 all four predictors were between 1.02 and 1.05.  
5  
6  
7

8 [Insert Table 2 Here]  
9  
10

## 11 **DISCUSSION**

12 This study examined risks of MAP in a clinical sample in which there was recent use of MA.  
13 The recent MA use and recent MAP were confirmed by using hair analysis and MINI-Plus,  
14 respectively. The low BPRS scores (mean=25.42) of the MAP group suggested that they  
15 were assessed after the recovery of psychosis. Risks of MA psychosis included being male,  
16 meeting the DSM-IV diagnosis of MA dependence, history of hospitalization for substance  
17 abuse, and using MA  $\geq 16$  days in the past month. However, the amount of MA use measured  
18 by hair analysis was not related with experience of MA psychosis.  
19  
20  
21  
22  
23  
24  
25  
26

27 Although there have been many studies on the risks of MAP, only a few of them were carried  
28 out in MA users with a recent history of psychosis<sup>26-28</sup>. Although the mean level of hair MA  
29 in the MAP group was higher, the differences of these levels were not significant between  
30 groups. This finding was in contrast with that of a previous study reporting the association of  
31 MA amount of use and lifetime diagnosis of MAP<sup>29</sup>. Similar to the findings from two  
32 previous studies<sup>27,28</sup>, we did find a correlation between the frequency of recent MA use and  
33 the development of MAP. However, the previous and the present studies differ on at least two  
34 respects. While the previous studies assessed the association of self-reported MA use and  
35 lifetime MAP, our study examined the correlation between hair MA levels and recent MAP.  
36 If any future study confirms the present findings, that frequency but not amount of MA use  
37 predicts MAP, it would mean that frequency is more important than the amount of MA use in  
38 predicting MAP.  
39  
40  
41  
42  
43  
44  
45  
46  
47  
48  
49

50 This study assessed MA dependence using two measures, the SDS and the DSM-IV diagnosis  
51 of MA dependence. Our finding that MA-dependent users had a higher risk of MAP than a  
52 MA abuser confirms a previous report<sup>30</sup>. In another study, the investigators found a  
53 correlation between MAP and MA dependence, defined by using a SDS score of 4 or more<sup>28</sup>.  
54 However, our study did not find a difference in SDS scores between groups. The discordance  
55 between the diagnosis of MA dependence and SDS scores may reflect that these two  
56  
57  
58  
59  
60

measures assess different aspects of MA dependence. The present finding that the history of hospitalization for substance use could predict MAP appears to be in concordance with the predictability of MA dependence. Taken together, the SDS should be used with caution in future clinical studies of MAP.

Although a literature review did not find any correlation between sociodemographic characteristics and MAP<sup>11</sup>, our and previous studies did find that male MA users were more likely to experience MAP<sup>27</sup>. As two diseases in the same continuum<sup>31</sup>, the higher risk of males for MAP appears to be in line with the findings that males are more likely than females to develop schizophrenia<sup>32</sup>.

To our knowledge, this is the first study using hair analysis to confirm recent MA use and determine the amount of MA use. By using this objective test, we excluded the data of 11 participants with negative results of hair analysis. The amount of MA use measured by hair analysis in this study should be more accurate than that calculated based on self-reporting<sup>29</sup>. The recent MAP diagnosed in this study was also confirmed using the MINI-Plus, Psychotic Module, which is a structure clinical interview widely used for diagnosis. By using the logistic regression, the predictors found in this study had already been adjusted by multiple variables.

There were several limitations of this study. Firstly, only few females, intravenous users, and those with a history of hospitalization for mental illnesses participated in this study. The present findings, therefore, could not apply in these populations. Secondly, the Nagelkerke  $R^2$  (Cragg and Uhler) of 0.26 suggested that these four variables could explain 26% of the variance, which implied that some risks of MAP were not included in the study. Examples of risks reported in previous studies but not included in the present study are: polydrug use<sup>26</sup>; history of conduct, depressive, and anxiety disorders<sup>27</sup>; pre-morbid schizoid/schizotypal personality trait<sup>29</sup>; *family history of psychotic disorders*<sup>27</sup>; *family history of schizophrenia and bipolar disorder*<sup>33</sup>. Not only the transient MAP, relatives of persistent patients with MAP also had a higher prevalence rate of schizophrenia compared to relatives of patients with transient MAP<sup>34</sup>. Thirdly, as a cross-sectional study, we could not confirm that the group without MAP would not develop a psychotic illness at a later point of time. Fourthly, the group without MAP participated in this study was MA users who were hospitalized due to MA use disorder. As heavy users of MA, this comparison group, therefore, might not be

1  
2  
3 much different from the MAP group. Fifthly, some important data were not recorded, e.g., the  
4 frequency of hospitalizations, the period of time between last MA use and the hair collection.  
5 Finally, based on the MOCA scores, the participants in this sample appeared to have mild  
6 cognitive impairment, which might affect the accuracy of reported data. Although the MOCA  
7 scores of the MAP group were significantly lower than those of the no MAP group, we did  
8 not include this variable in the logistic regression model. This decision was made because the  
9 poorer cognition in the MAP group might not be a risk but be a consequence of MAP.  
10  
11  
12  
13  
14  
15  
16

17 Health professionals should closely monitor the development of MAP in MA-dependent men  
18 who frequently use MA and have a history of hospitalization for substance abuse. The  
19 measure of MA concentration levels in the hair may add no benefit for the prediction of the  
20 development of MAP. *Future studies on the correlation between the amount of MA use and*  
21 *the development of MAP are warranted.*  
22  
23  
24  
25  
26  
27  
28  
29  
30  
31  
32  
33  
34  
35  
36  
37  
38  
39  
40  
41  
42  
43  
44  
45  
46  
47  
48  
49  
50  
51  
52  
53  
54  
55  
56  
57  
58  
59  
60

## Acknowledgments

We are grateful to Dr. Phunnapa Kittirattanapaiboon and Dr. Boonsiri Jansirimongkol for giving advice on this work, and Dr. Wiranpat Kittitharaphan for her administrative support.

## Contributors

WL conceived the idea of this work, collected the data, analyzed/interpreted the data, and drafted the article. KP, DI, AS, and NS conceived the idea of this work and collected the data. PK, PS and AJ conceived the idea of this work, collected the data, and drafted the article. MS conceived the idea of this work, analyzed/interpreted the data, and drafted the article. All authors critically revised the article and approved the final manuscript.

## Funding

This study was supported by a grant from the Department of Mental Health, Ministry of Public Health, Thailand. The sponsor had no role in the analysis and interpretation of data, the manuscript preparation or writing, and the decision to submit the manuscript.

## Competing interests

M.S. has received speaker's honorarium from Lundbeck and Sumitomo Dainippon Pharma. WL, KP, DI, AS, NS, PK, PS, and AJ declare no competing interests.

## Patient consent for publication

Not required

## Ethics approvals

Approval for this study was obtained from the local medical ethics committee 'Nakhon Phanom Rajanagarindra Psychiatric Hospital' under the project number 102/2558 on June 25, 2015.

## Provenance and peer review

Not commissioned, externally peer reviewed.

## Data sharing statement

No additional data from this study are available from a repository. Data are available on request from the corresponding author.

**REFERENCES**

- 1 United Nations Office on Drugs and Crime. *World Drug Report 2018: Global Overview of Drug Demand and Supply (Booklet 2)*. United Nation Publication: Vienna, Austria, 2018.
- 2 United Nations Office on Drugs and Crime. *World Drug Report 2013*. United Nations: Vienna, 2013.
- 3 Alharbi F, el-Guebaly N. Cannabis and Amphetamine-type Stimulant-induced Psychoses: A Systematic Overview. *Addict Disord Their Treat* 2016; **15**: 190–200.
- 4 Srisurapanont M, Ali R, Marsden J, Sunga A, Wada K, Monteiro M. Psychotic symptoms in methamphetamine psychotic in-patients. *Int J Neuropsychopharmacol* 2003; **6**: 347–52.
- 5 Srisurapanont M, Arunpongpaisal S, Wada K, Marsden J, Ali R, Kongsakon R. Comparisons of methamphetamine psychotic and schizophrenic symptoms: a differential item functioning analysis. *Prog Neuropsychopharmacol Biol Psychiatry* 2011; **35**: 959–64.
- 6 McKetin R, Lubman DI, Najman JM, Dawe S, Butterworth P, Baker AL. Does methamphetamine use increase violent behaviour? Evidence from a prospective longitudinal study. *Addiction* 2014; **109**: 798–806.
- 7 Glasner-Edwards S, Mooney LJ, Marinelli-Casey P, Hillhouse M, Ang A, Rawson R *et al*. Clinical course and outcomes of methamphetamine-dependent adults with psychosis. *J Subst Abuse Treat* 2008; **35**: 445–450.
- 8 Caton CLM, Drake RE, Hasin DS, Dominguez B, Shrout PE, Samet S *et al*. Differences between early-phase primary psychotic disorders with concurrent substance use and substance-induced psychoses. *Arch Gen Psychiatry* 2005; **62**: 137–145.
- 9 Kittirattanapaiboon P, Mahatnirunkul S, Booncharoen H, Thummawong P, Dumrongchai U, Chutha W. Long-term outcomes in methamphetamine psychosis patients after first hospitalisation. *Drug Alcohol Rev* 2010; **29**: 456–461.
- 10 Ujike H, Sato M. Clinical features of sensitization to methamphetamine observed in patients with methamphetamine dependence and psychosis. *Ann N Y Acad Sci* 2004; **1025**: 279–287.
- 11 Arunogiri S, Foulds JA, McKetin R, Lubman DI. A systematic review of risk factors for methamphetamine-associated psychosis. *Aust N Z J Psychiatry* 2018; **52**: 514–529.
- 12 Sheehan DV, Lecrubier Y, Sheehan KH, Amorim P, Janavs J, Weiller E *et al*. The Mini-International Neuropsychiatric Interview (M.I.N.I.): the development and validation of a

- 1  
2  
3 structured diagnostic psychiatric interview for DSM-IV and ICD-10. *J Clin Psychiatry*  
4 1998; **59 Suppl 20**: 22–33.
- 5  
6  
7 13 Kroenke K, Spitzer RL, Williams JB. The PHQ-9: validity of a brief depression severity  
8 measure. *J Gen Intern Med* 2001; **16**: 606–613.
- 9  
10  
11 14 Srisurapanont M, Jarusuraisin N, Jittiwutikan J. Amphetamine withdrawal: I. Reliability,  
12 validity and factor structure of a measure. *Aust N Z J Psychiatry* 1999; **33**: 89–93.
- 13  
14 15 Sobell LC, Sobell MB. Timeline Follow-Back. In: *Measuring Alcohol Consumption*.  
15 Humana Press, Totowa, NJ, 1992, pp 41–72.
- 16  
17 16 Gossop M, Darke S, Griffiths P, Hando J, Powis B, Hall W *et al*. The Severity of  
18 Dependence Scale (SDS): psychometric properties of the SDS in English and Australian  
19 samples of heroin, cocaine and amphetamine users. *Addiction* 1995; **90**: 607–614.
- 20  
21 22 Overall JE, Gorham DR. The Brief Psychiatric Rating Scale. *Psychol Rep* 1962; **10**: 799–  
23 812.
- 24  
25 26 Nasreddine ZS, Phillips NA, Bédirian V, Charbonneau S, Whitehead V, Collin I *et al*.  
27 The Montreal Cognitive Assessment, MoCA: a brief screening tool for mild cognitive  
28 impairment. *J Am Geriatr Soc* 2005; **53**: 695–699.
- 29  
30 31 Suwannachom N, Thananchai T, Junkuy A, O’Brien TE, Sribanditmongkol P. Duration  
32 of detection of methamphetamine in hair after abstinence. *Forensic Sci Int* 2015; **254**:  
33 80–86.
- 34  
35 36 Peduzzi P, Concato J, Kemper E, Holford TR, Feinstein AR. A simulation study of the  
37 number of events per variable in logistic regression analysis. *J Clin Epidemiol* 1996; **49**:  
38 1373–1379.
- 39  
40 41 Sheather S. *A Modern Approach to Regression with R*. Springer-Verlag: New York,  
42 2009//www.springer.com/gp/book/9780387096070 (accessed 21 Aug2018).
- 43  
44 45 R Core Team. *A language and environment for statistical computing*. R Foundation for  
46 *Statistical Computing*. Vienna, Austria, 2018<https://www.R-project.org/>.
- 47  
48 49 Daniel-Corneliu L. *RcmdrPlugin.ROC: Rcmdr Receiver Operator Characteristic Plug-In*  
50 *PACKAGE*. R package version 1.0-18. 2015[https://CRAN.R-](https://CRAN.R-project.org/package=RcmdrPlugin.ROC)  
51 [project.org/package=RcmdrPlugin.ROC](https://CRAN.R-project.org/package=RcmdrPlugin.ROC).
- 52  
53 54 Fox J. The R Commander: A Basic Statistics Graphical User Interface to R. *J Stat Softw*  
55 2005; **14**: 1–42.
- 56  
57 58 Salvatore M. *Rcompanion: Functions to Support Extension Education Program*  
59 *Evaluation*. R package version 1.13.2. 2018[https://CRAN.R-](https://CRAN.R-project.org/package=rcompanion)  
60 [project.org/package=rcompanion](https://CRAN.R-project.org/package=rcompanion).

- 1  
2  
3  
4  
5  
6  
7  
8  
9  
10  
11  
12  
13  
14  
15  
16  
17  
18  
19  
20  
21  
22  
23  
24  
25  
26  
27  
28  
29  
30  
31  
32  
33  
34  
35  
36  
37  
38  
39  
40  
41  
42  
43  
44  
45  
46  
47  
48  
49  
50  
51  
52  
53  
54  
55  
56  
57  
58  
59  
60
- 26 McKetin R, Hickey K, Devlin K, Lawrence K. The risk of psychotic symptoms associated with recreational methamphetamine use. *Drug Alcohol Rev* 2010; **29**: 358–363.
- 27 McKetin R, Lubman DI, Baker AL, Dawe S, Ali RL. Dose-related psychotic symptoms in chronic methamphetamine users: evidence from a prospective longitudinal study. *JAMA Psychiatry* 2013; **70**: 319–324.
- 28 McKetin R, McLaren J, Lubman DI, Hides L. The prevalence of psychotic symptoms among methamphetamine users. *Addiction* 2006; **101**: 1473–1478.
- 29 Chen CK, Lin SK, Sham PC, Ball D, Loh EW, Hsiao CC *et al*. Pre-morbid characteristics and co-morbidity of methamphetamine users with and without psychosis. *Psychol Med* 2003; **33**: 1407–1414.
- 30 Smith MJ, Thirthalli J, Abdallah AB, Murray RM, Cottler LB. Prevalence of psychotic symptoms in substance users: a comparison across substances. *Compr Psychiatry* 2009; **50**: 245–250.
- 31 Bramness JG, Gundersen ØH, Guterstam J, Rognli EB, Konstenius M, Løberg E-M *et al*. Amphetamine-induced psychosis - a separate diagnostic entity or primary psychosis triggered in the vulnerable? *BMC Psychiatry* 2012; **12**: 221.
- 32 McGrath J, Saha S, Chant D, Welham J. Schizophrenia: A Concise Overview of Incidence, Prevalence, and Mortality. *Epidemiol Rev* 2008; **30**: 67–76.
- 33 Hides L, Dawe S, McKetin R, Kavanagh DJ, Young RM, Teesson M *et al*. Primary and substance-induced psychotic disorders in methamphetamine users. *Psychiatry Res* 2015; **226**: 91–96.
- 34 Chen C-K, Lin S-K, Sham PC, Ball D, Loh E-W, Murray RM. Morbid risk for psychiatric disorder among the relatives of methamphetamine users with and without psychosis. *Am J Med Genet B Neuropsychiatr Genet* 2005; **136B**: 87–91.

**Table 1: Demographic and clinical characteristics of MA users with and without psychosis**

|                                                      | MA users without psychosis (N = 120) | MA users with psychosis (N=113) | Statistical analysis           |
|------------------------------------------------------|--------------------------------------|---------------------------------|--------------------------------|
|                                                      | n (%)                                | n (%)                           | Chi-Square/Fisher's Exact test |
| Gender: Male                                         | 95 (79.2)                            | 106 (93.8)                      | $\chi^2=9.33$<br>$p=0.002$     |
| MA use disorder                                      |                                      |                                 |                                |
| Abuse                                                | 18 (15.0)                            | 2 (1.8)                         | OR=9.72<br>$p<0.001$           |
| Dependence                                           | 102 (85)                             | 111 (98.2)                      |                                |
| Co-morbid alcohol use disorder (including lifetime)  | 52 (43.3)                            | 54 (47.8)                       | $\chi^2=0.303$<br>$p=0.582$    |
| Co-morbid cannabis use disorder (including lifetime) | 25 (20.8)                            | 33 (29.2)                       | $\chi^2=1.756$<br>$p=0.185$    |
| History of intravenous drug use                      | 4 (3.3)                              | 5 (4.4)                         | OR=1.34<br>$p=0.743$           |
| History of suicide attempt                           | 10 (8.3)                             | 17 (15.0)                       | $\chi^2=1.95$<br>$p=0.163$     |
| Antisocial personality disorder                      | 13 (10.8)                            | 27 (23.9)                       | $\chi^2=6.09$<br>$p=0.014$     |
| History of hospitalization for mental illnesses      | 1 (0.8)                              | 11 (9.7)                        | OR=12.73<br>$p=0.002$          |
| History of hospitalization for substance abuse       | 24 (20)                              | 52 (46)                         | $\chi^2=16.76$ $p<0.001$       |
| Most common route of MA use in the past month        |                                      |                                 |                                |
| Smoking                                              | 120 (100.0)                          | 107 (94.7)                      | OR=0.0<br>$p=0.012$            |

|                                         | MA users without psychosis (N = 120) | MA users with psychosis (N=113) | Statistical analysis         |
|-----------------------------------------|--------------------------------------|---------------------------------|------------------------------|
| Intravenous use                         | 0 (0.0)                              | 6 (5.3)                         |                              |
| ≥16 days of MA use in the past month    | 23 (19.2)                            | 41 (36.3)                       | $\chi^2=7.72$<br>$p=0.005$   |
|                                         |                                      |                                 |                              |
|                                         | <b>Mean (SD)</b>                     | <b>Mean (SD)</b>                | <b>Student <i>t</i>-test</b> |
| Age (years)                             | 27.8 (7.72)                          | 28.75 (6.65)                    | $t=1.006$ ,<br>$p=0.316$     |
| Age at first MA use (years)             | 19.04 (5.83)                         | 17.65 (4.31)                    | $t=2.068$ ,<br>$p=0.040$     |
| Severity of dependence (SDS score)      | 4.70 (2.34)                          | 5.08 (2.38)                     | $t=1.227$ ,<br>$p=0.221$     |
| Cognitive function (MoCA score)         | 25.77 (3.23)                         | 24.95 (2.96)                    | $t=2.01$ , $p=0.046$         |
| MA concentration levels in hair (ng/mg) | 18.93 (24.66)                        | 13.68 (25.95)                   | $t=1.582$ ,<br>$p=0.115$     |

MA: methamphetamine, SDS: Severity of Dependence Scale, MoCA: Montreal Cognitive Assessment

**Table 2 Manual backward elimination and binary logistic regression analysis to determine the risks for MA psychosis**

| <b>Risk factor</b>                                                                | $\beta$  | SE   | <b>Odds ratio (95% confidence interval)</b> |
|-----------------------------------------------------------------------------------|----------|------|---------------------------------------------|
| Intercept                                                                         | -4.05*** | 0.91 | 0.02 (0.00-0.10)                            |
| Male (vs. female)                                                                 | 1.39**   | 0.48 | 4.03 (1.59-10.20)                           |
| MA dependence (vs. MA abuse)                                                      | 2.24**   | 0.79 | 9.41 (2.01- 44.00)                          |
| History of hospitalization for substance abuse (vs. no history)                   | 1.35***  | 0.33 | 3.85 (2.03-7.28)                            |
| $\geq 16$ days of MA use in the past month (vs. $\leq 15$ days in the past month) | 0.86*    | 0.33 | 2.35 (1.22-4.52)                            |

MA: methamphetamine

\*\*\* $p < 0.001$ ; \*\* $p < 0.01$ ; \* $p < 0.05$ .

Nagelkerke  $R^2$  (Cragg and Uhler) = 0.26

Hosmer and Lemeshow goodness of fit (GOF) test:  $\chi^2 = 1.39$ ,  $df = 8$ ,  $p$ -value = 0.99

# Reporting checklist for cross sectional study.

Based on the STROBE cross sectional guidelines.

## Instructions to authors

Complete this checklist by entering the page numbers from your manuscript where readers will find each of the items listed below.

Your article may not currently address all the items on the checklist. Please modify your text to include the missing information. If you are certain that an item does not apply, please write "n/a" and provide a short explanation.

Upload your completed checklist as an extra file when you submit to a journal.

In your methods section, say that you used the STROBE cross sectional reporting guidelines, and cite them as:

von Elm E, Altman DG, Egger M, Pocock SJ, Gøtzsche PC, Vandenbroucke JP. The Strengthening the Reporting of Observational Studies in Epidemiology (STROBE) Statement: guidelines for reporting observational studies.

|                            |                     | Reporting Item                                                                                                                                                                                                                                                       | Page Number |
|----------------------------|---------------------|----------------------------------------------------------------------------------------------------------------------------------------------------------------------------------------------------------------------------------------------------------------------|-------------|
| <b>Title and abstract</b>  |                     |                                                                                                                                                                                                                                                                      |             |
| Title                      | <a href="#">#1a</a> | Indicate the study's design with a commonly used term in the title or the abstract                                                                                                                                                                                   | 1           |
| Abstract                   | <a href="#">#1b</a> | Provide in the abstract an informative and balanced summary of what was done and what was found                                                                                                                                                                      | 2           |
| <b>Introduction</b>        |                     |                                                                                                                                                                                                                                                                      |             |
| Background / rationale     | <a href="#">#2</a>  | Explain the scientific background and rationale for the investigation being reported                                                                                                                                                                                 | 4-5         |
| Objectives                 | <a href="#">#3</a>  | State specific objectives, including any prespecified hypotheses                                                                                                                                                                                                     | 5           |
| <b>Methods</b>             |                     |                                                                                                                                                                                                                                                                      |             |
| Study design               | <a href="#">#4</a>  | Present key elements of study design early in the paper                                                                                                                                                                                                              | 5           |
| Setting                    | <a href="#">#5</a>  | Describe the setting, locations, and relevant dates, including periods of recruitment, exposure, follow-up, and data collection                                                                                                                                      | 5           |
| Eligibility criteria       | <a href="#">#6a</a> | Give the eligibility criteria, and the sources and methods of selection of participants.                                                                                                                                                                             | 5           |
|                            | <a href="#">#7</a>  | Clearly define all outcomes, exposures, predictors, potential confounders, and effect modifiers. Give diagnostic criteria, if applicable                                                                                                                             | 6           |
| Data sources / measurement | <a href="#">#8</a>  | For each variable of interest give sources of data and details of methods of assessment (measurement). Describe comparability of assessment methods if there is more than one group. Give information separately for for exposed and unexposed groups if applicable. | 6           |

|    |                        |                      |                                                                                                                                                                                                                                                                            |       |
|----|------------------------|----------------------|----------------------------------------------------------------------------------------------------------------------------------------------------------------------------------------------------------------------------------------------------------------------------|-------|
| 1  | Bias                   | <a href="#">#9</a>   | Describe any efforts to address potential sources of bias                                                                                                                                                                                                                  | 5     |
| 2  |                        |                      |                                                                                                                                                                                                                                                                            |       |
| 3  | Study size             | <a href="#">#10</a>  | Explain how the study size was arrived at                                                                                                                                                                                                                                  | 7     |
| 4  |                        |                      |                                                                                                                                                                                                                                                                            |       |
| 5  | Quantitative variables | <a href="#">#11</a>  | Explain how quantitative variables were handled in the analyses. If applicable, describe which groupings were chosen, and why                                                                                                                                              | 7     |
| 6  |                        |                      |                                                                                                                                                                                                                                                                            |       |
| 7  |                        |                      |                                                                                                                                                                                                                                                                            |       |
| 8  | Statistical methods    | <a href="#">#12a</a> | Describe all statistical methods, including those used to control for confounding                                                                                                                                                                                          | 7     |
| 9  |                        |                      |                                                                                                                                                                                                                                                                            |       |
| 10 | Statistical methods    | <a href="#">#12b</a> | Describe any methods used to examine subgroups and interactions                                                                                                                                                                                                            | 7     |
| 11 |                        |                      |                                                                                                                                                                                                                                                                            |       |
| 12 | Statistical methods    | <a href="#">#12c</a> | Explain how missing data were addressed                                                                                                                                                                                                                                    | 7     |
| 13 |                        |                      |                                                                                                                                                                                                                                                                            |       |
| 14 | Statistical methods    | <a href="#">#12d</a> | If applicable, describe analytical methods taking account of sampling strategy                                                                                                                                                                                             | N/A   |
| 15 |                        |                      |                                                                                                                                                                                                                                                                            |       |
| 16 | Statistical methods    | <a href="#">#12e</a> | Describe any sensitivity analyses                                                                                                                                                                                                                                          | N/A   |
| 17 |                        |                      |                                                                                                                                                                                                                                                                            |       |
| 18 |                        |                      |                                                                                                                                                                                                                                                                            |       |
| 19 | <b>Results</b>         |                      |                                                                                                                                                                                                                                                                            |       |
| 20 |                        |                      |                                                                                                                                                                                                                                                                            |       |
| 21 | Participants           | <a href="#">#13a</a> | Report numbers of individuals at each stage of study—eg numbers potentially eligible, examined for eligibility, confirmed eligible, included in the study, completing follow-up, and analysed. Give information separately for exposed and unexposed groups if applicable. | 8     |
| 22 |                        |                      |                                                                                                                                                                                                                                                                            |       |
| 23 |                        |                      |                                                                                                                                                                                                                                                                            |       |
| 24 |                        |                      |                                                                                                                                                                                                                                                                            |       |
| 25 |                        |                      |                                                                                                                                                                                                                                                                            |       |
| 26 | Participants           | <a href="#">#13b</a> | Give reasons for non-participation at each stage                                                                                                                                                                                                                           | 8     |
| 27 |                        |                      |                                                                                                                                                                                                                                                                            |       |
| 28 | Participants           | <a href="#">#13c</a> | Consider use of a flow diagram                                                                                                                                                                                                                                             | N/A   |
| 29 |                        |                      |                                                                                                                                                                                                                                                                            |       |
| 30 | Descriptive data       | <a href="#">#14a</a> | Give characteristics of study participants (eg demographic, clinical, social) and information on exposures and potential confounders. Give information separately for exposed and unexposed groups if applicable.                                                          | 8, 16 |
| 31 |                        |                      |                                                                                                                                                                                                                                                                            |       |
| 32 |                        |                      |                                                                                                                                                                                                                                                                            |       |
| 33 |                        |                      |                                                                                                                                                                                                                                                                            |       |
| 34 |                        |                      |                                                                                                                                                                                                                                                                            |       |
| 35 | Descriptive data       | <a href="#">#14b</a> | Indicate number of participants with missing data for each variable of interest                                                                                                                                                                                            | 8     |
| 36 |                        |                      |                                                                                                                                                                                                                                                                            |       |
| 37 | Outcome data           | <a href="#">#15</a>  | Report numbers of outcome events or summary measures. Give information separately for exposed and unexposed groups if applicable.                                                                                                                                          | 15    |
| 38 |                        |                      |                                                                                                                                                                                                                                                                            |       |
| 39 |                        |                      |                                                                                                                                                                                                                                                                            |       |
| 40 |                        |                      |                                                                                                                                                                                                                                                                            |       |
| 41 | Main results           | <a href="#">#16a</a> | Give unadjusted estimates and, if applicable, confounder-adjusted estimates and their precision (eg, 95% confidence interval). Make clear which confounders were adjusted for and why they were included                                                                   | 8, 16 |
| 42 |                        |                      |                                                                                                                                                                                                                                                                            |       |
| 43 |                        |                      |                                                                                                                                                                                                                                                                            |       |
| 44 |                        |                      |                                                                                                                                                                                                                                                                            |       |
| 45 | Main results           | <a href="#">#16b</a> | Report category boundaries when continuous variables were categorized                                                                                                                                                                                                      | 8, 16 |
| 46 |                        |                      |                                                                                                                                                                                                                                                                            |       |
| 47 | Main results           | <a href="#">#16c</a> | If relevant, consider translating estimates of relative risk into absolute risk for a meaningful time period                                                                                                                                                               | N/A   |
| 48 |                        |                      |                                                                                                                                                                                                                                                                            |       |
| 49 |                        |                      |                                                                                                                                                                                                                                                                            |       |
| 50 |                        |                      |                                                                                                                                                                                                                                                                            |       |
| 51 | Other analyses         | <a href="#">#17</a>  | Report other analyses done—e.g., analyses of subgroups and interactions, and sensitivity analyses                                                                                                                                                                          | 8     |
| 52 |                        |                      |                                                                                                                                                                                                                                                                            |       |
| 53 |                        |                      |                                                                                                                                                                                                                                                                            |       |
| 54 |                        |                      |                                                                                                                                                                                                                                                                            |       |
| 55 | <b>Discussion</b>      |                      |                                                                                                                                                                                                                                                                            |       |
| 56 |                        |                      |                                                                                                                                                                                                                                                                            |       |
| 57 | Key results            | <a href="#">#18</a>  | Summarise key results with reference to study objectives                                                                                                                                                                                                                   | 9     |
| 58 |                        |                      |                                                                                                                                                                                                                                                                            |       |
| 59 |                        |                      |                                                                                                                                                                                                                                                                            |       |
| 60 |                        |                      |                                                                                                                                                                                                                                                                            |       |

|    |                                 |                     |                                                                                                         |              |
|----|---------------------------------|---------------------|---------------------------------------------------------------------------------------------------------|--------------|
| 1  | <i>Limitations</i>              | <a href="#">#19</a> | <i>Discuss limitations of the study, taking into account sources of potential bias or imprecision.</i>  | <i>10-11</i> |
| 2  |                                 |                     | <i>Discuss both direction and magnitude of any potential bias.</i>                                      |              |
| 3  |                                 |                     |                                                                                                         |              |
| 4  | <i>Interpretation</i>           | <a href="#">#20</a> | <i>Give a cautious overall interpretation considering objectives, limitations, multiplicity of</i>      | <i>10-11</i> |
| 5  |                                 |                     | <i>analyses, results from similar studies, and other relevant evidence.</i>                             |              |
| 6  |                                 |                     |                                                                                                         |              |
| 7  |                                 |                     |                                                                                                         |              |
| 8  | <i>Generalisability</i>         | <a href="#">#21</a> | <i>Discuss the generalisability (external validity) of the study results</i>                            | <i>11</i>    |
| 9  |                                 |                     |                                                                                                         |              |
| 10 | <b><i>Other Information</i></b> |                     |                                                                                                         |              |
| 11 |                                 |                     |                                                                                                         |              |
| 12 | <i>Funding</i>                  | <a href="#">#22</a> | <i>Give the source of funding and the role of the funders for the present study and, if applicable,</i> | <i>12</i>    |
| 13 |                                 |                     | <i>for the original study on which the present article is based</i>                                     |              |
| 14 |                                 |                     |                                                                                                         |              |

The STROBE checklist is distributed under the terms of the Creative Commons Attribution License CC-BY. This checklist was completed on 01. July 2019 using <https://www.goodreports.org/>, a tool made by the [EQUATOR Network](#) in collaboration with [Penelope.ai](#)
